# Supplementary material for: A global dataset of standardized moisture anomaly index incorporating snow dynamics from 1948 to 2010
Source: Copernicus journal article supplement (doi:10.5194/essd-2021-399), 2021-11-26
Supplement: Supplementary file 1 [file essd-2021-399-supplement.pdf]

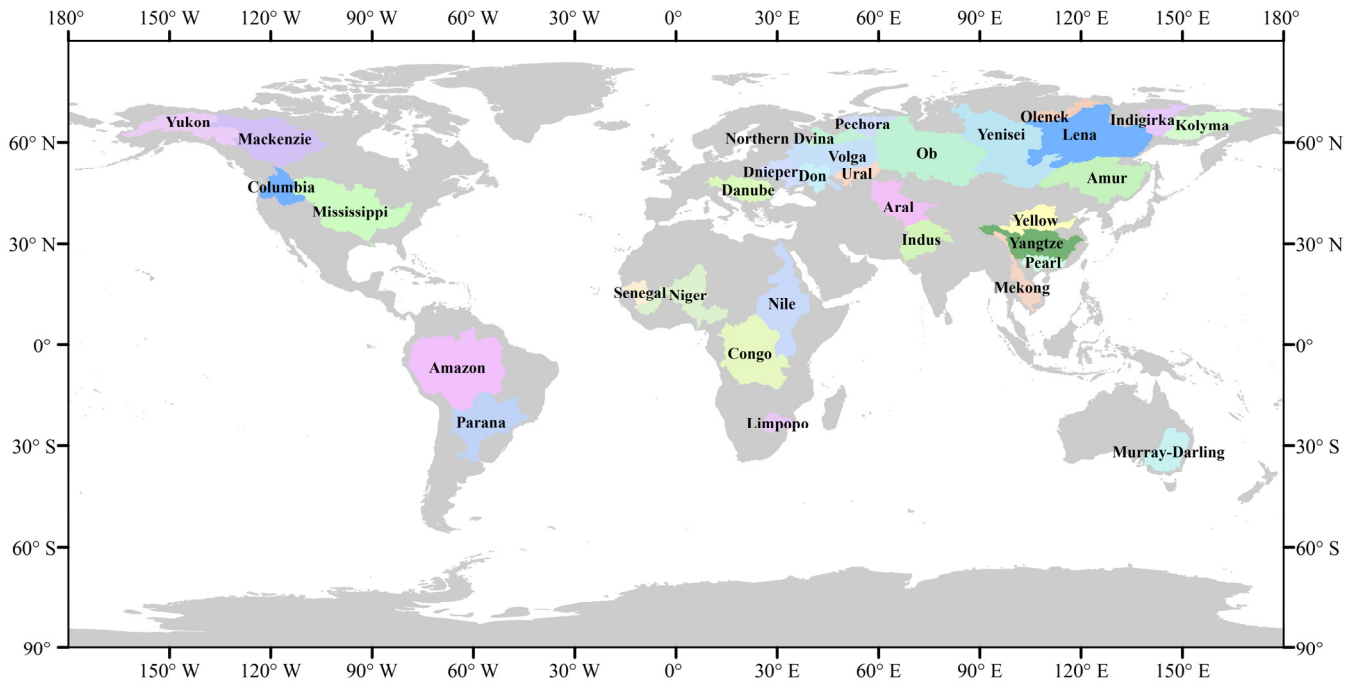

**Figure S1. Locations of the 32 large basins used to evaluate the  $SZI_{snow}$ .**

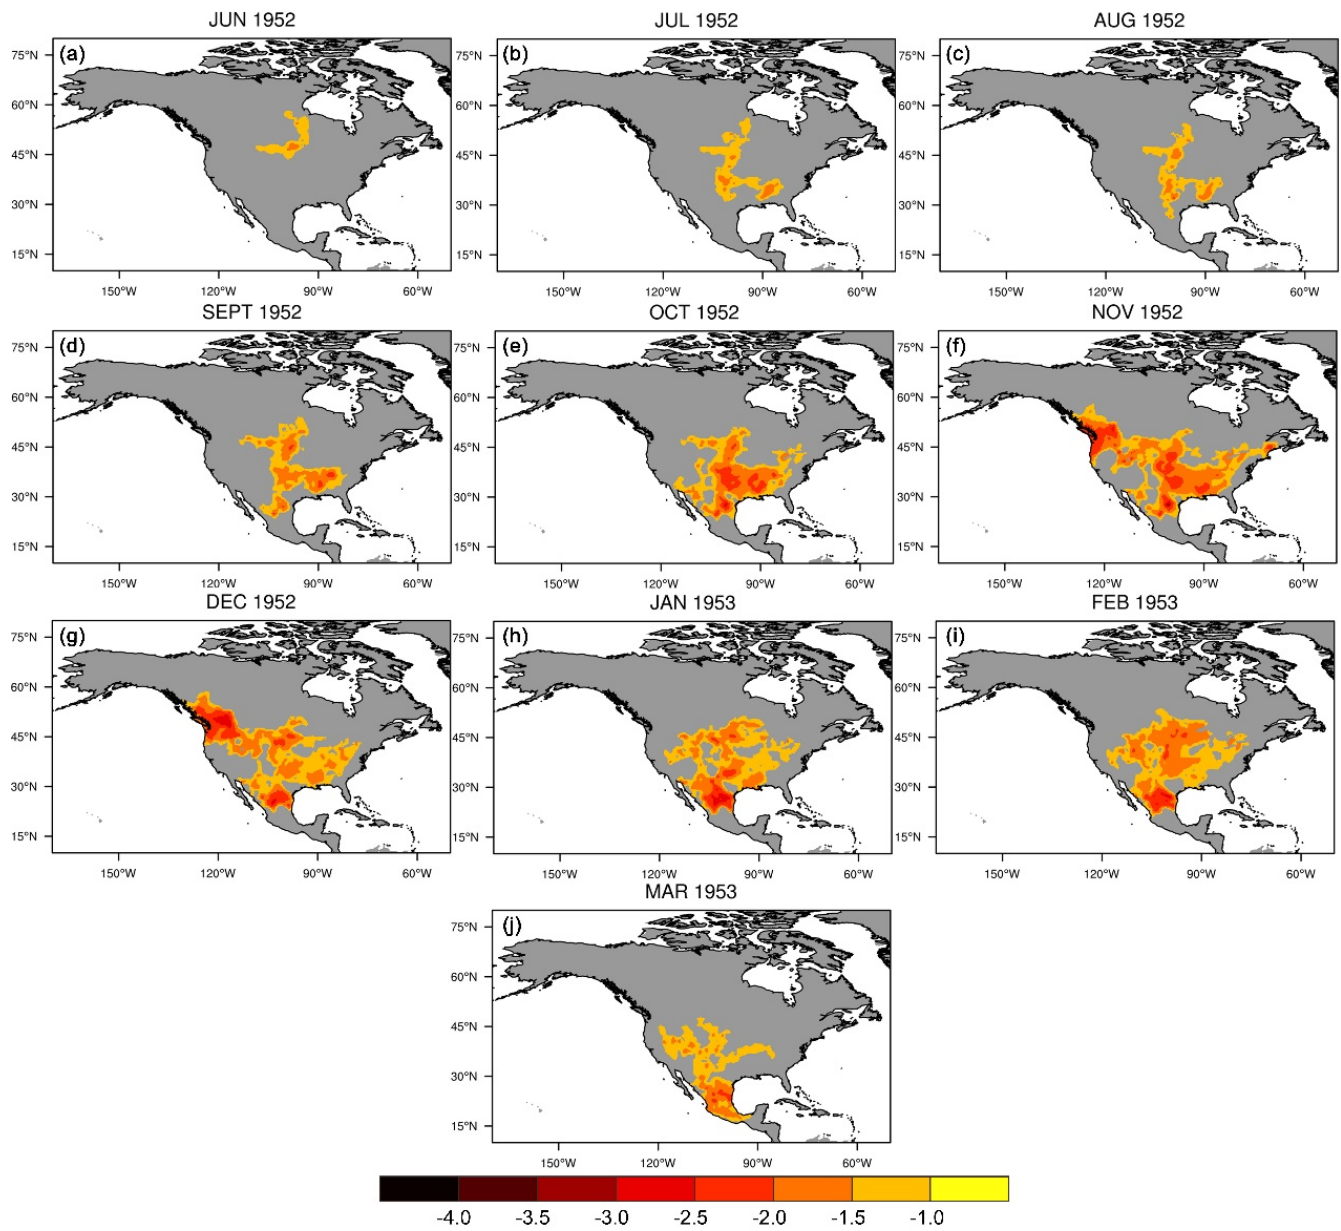

**Figure S2. Development of a large-scale contiguous drought event in North America identified by the severity–area–duration (SAD) drought diagnosis method. This event started in June 1952 and ceased in March 1953.**

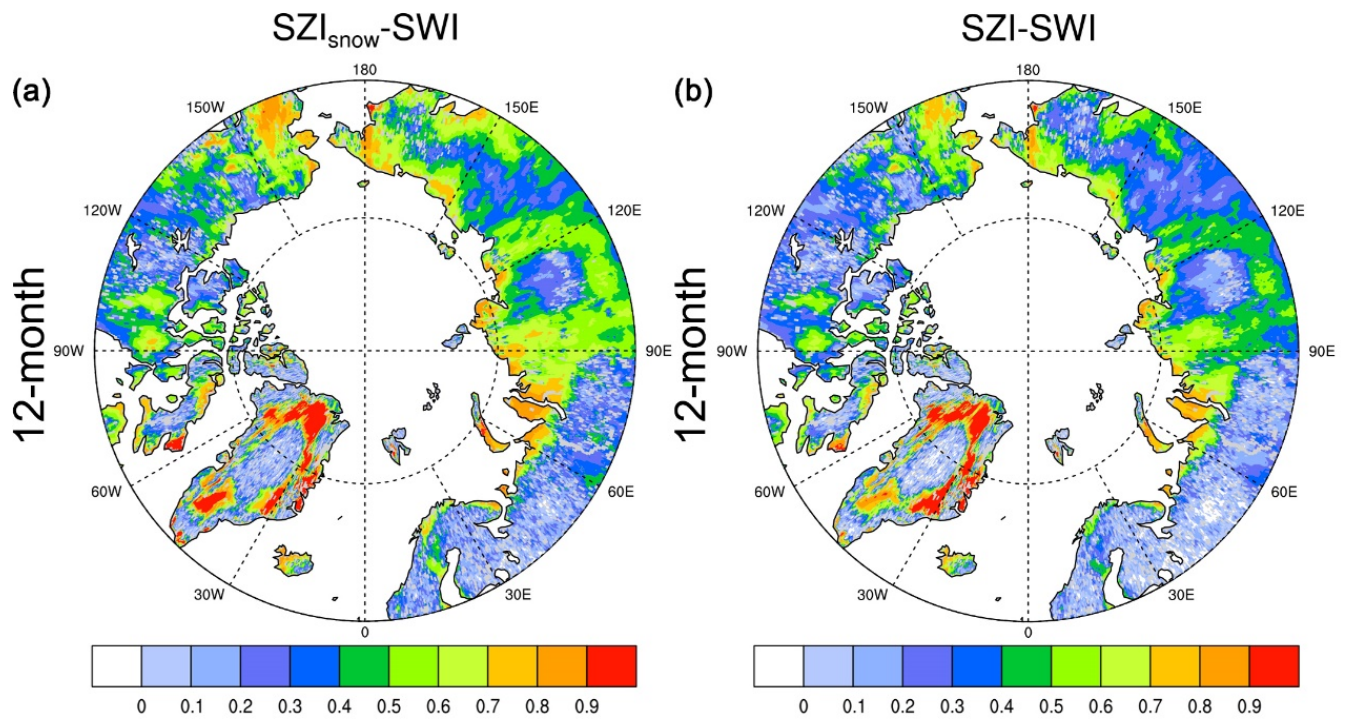

Figure S3. Comparison between the SZI and SZI<sub>snow</sub> in the context of their performance over the Arctic region. (a) Spatial distribution of the correlation coefficients of the SZI<sub>snow</sub>-SWI over a 12-month timescale. (b) Spatial distribution of the correlation coefficients of the SZI-SWI over a 12-month timescale.

**Table S1. Full names of the drought indices listed in Figure 1.**

| Abbreviations | Full names                                 |
|---------------|--------------------------------------------|
| <i>SAI</i>    | Standardized Anomaly Index                 |
| <i>PHDI</i>   | Palmer Hydrological Drought Severity Index |
| <i>SWI</i>    | Standardized Water-level Index             |
| <i>SWS</i>    | Soil Water Storage                         |
| <i>SMA</i>    | Soil Moisture Anomaly                      |

**Table S2. Full names of the abbreviations used in the  $SZI_{snow}$  derivation equations.**

| Abbreviations | Full names                                   | Abbreviations    | Full names                   |
|---------------|----------------------------------------------|------------------|------------------------------|
| $ET$          | Evapotranspiration                           | $PL_t$           | Potential $L_t$              |
| $PET$         | Potential $ET$                               | $L_s$            | $L$ from bottom soil layer   |
| $E_b$         | Bare soil evaporation                        | $PL_s$           | Potential $L_s$              |
| $E_t$         | Transpiration                                | $SWE$            | Snow water equivalent        |
| $E_i$         | Canopy water evaporation                     | $\Delta SWE$     | Change of $SWE$              |
| $RO$          | Runoff                                       | $SA$             | $SWE$ accumulation           |
| $PRO$         | Potential $RO$                               | $PSA$            | Potential $SA$               |
| $RO_s$        | Surface runoff                               | $SM$             | Snowmelt                     |
| $RO_b$        | Baseflow                                     | $PSM$            | Potential $SM$               |
| $RO_{sm}$     | Snowmelt runoff                              | $P$              | Precipitation                |
| $R$           | Soil infiltration                            | $\hat{P}_{snow}$ | CAFEC precipitation          |
| $PR$          | Potential $R$                                | $P_{rainfall}$   | Rainfall                     |
| $AWC$         | Available soil water holding capacity        | $P_{snowfall}$   | Snowfall                     |
| $S_t$         | Available soil moisture in top soil layer    | $\alpha_j$       | Climatic coefficient of $ET$ |
| $S_u$         | Available soil moisture in bottom soil layer | $\beta_j$        | Climatic coefficient of $R$  |
| $\Delta S_t$  | Change of $S_t$                              | $\gamma_j$       | Climatic coefficient of $RO$ |
| $\Delta S_u$  | Change of $S_u$                              | $\delta_j$       | Climatic coefficient of $SA$ |
| $L$           | Soil moisture loss                           | $\varepsilon_j$  | Climatic coefficient of $L$  |
| $PL$          | Potential $L$                                | $\varphi_j$      | Climatic coefficient of $SM$ |
| $L_t$         | $L$ from top soil layer                      | $Z_{snow}$       | Moisture anomaly             |
